# Supplementary material for: Visible light induced enhanced photocatalytic degradation of organic pollutants in aqueous media using Ag doped hollow TiO2nanospheres
Source: Royal Society of Chemistry journal article supplement (doi:10.1039/c5ra03421c), 2015-01-01
Supplement: c5ra03421c1.pdf [file c5ra03421c1.pdf]

### Supporting information

for

### Visible light induced enhanced photocatalytic degradation of organic pollutants in aqueous media using Ag doped hollow TiO<sub>2</sub> nanospheres

Siddhartha Sankar Boxi, Santanu Paria\*

Interfaces and Nanomaterials Laboratory, Department of Chemical Engineering, National Institute of Technology, Rourkela 769008, Orissa, India.

The distribution of particle size of AgBr, TiO<sub>2</sub>, AgBr/TiO<sub>2</sub> and Ag-h-TiO<sub>2</sub> nanoparticles were measured in dynamic light scattering (DLS) instrument. The DLS data in Figure 1 shows that the average particle size was 16.89, 41.52, 20.81 and 20.79 nm for AgBr, TiO<sub>2</sub>, AgBr/TiO<sub>2</sub> core/shell and Ag-h-TiO<sub>2</sub> nanoparticles, respectively.

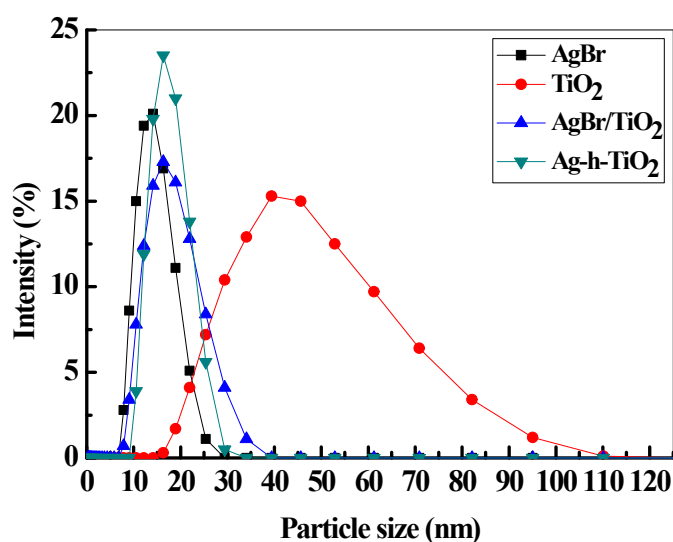

Figure S1. Particle size distribution of AgBr, TiO<sub>2</sub>, AgBr/TiO<sub>2</sub> and Ag-h-TiO<sub>2</sub> nanoparticles measured by dynamic light scattering (DLS).

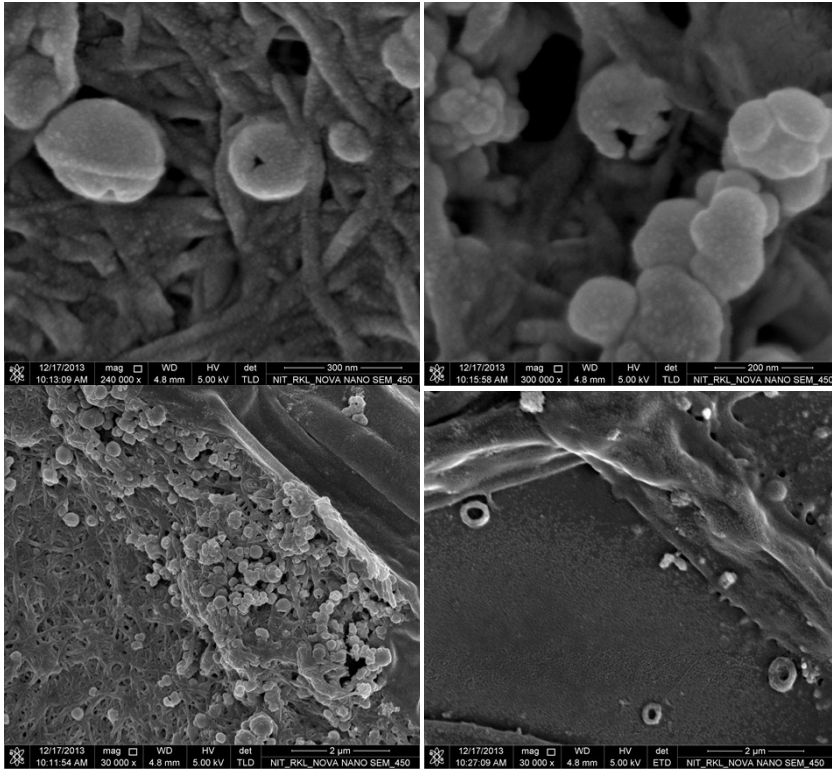

Figure S2: FE-SEM images of Ag-h-TiO<sub>2</sub> nanoparticles with some broken hollow structure.

### Quantum yield calculation

Quantum yield was calculated using the equation (1), where phenol was taken as the reference. The refractive index and quantum yield of phenol were taken 1.5425 and 0.14 respectively.

$$Q.Y_S = Q.Y_R \left( \frac{\text{Grad}_S}{\text{Grad}_R} \right) \times \left( \frac{\eta_S}{\eta_R} \right)^2 \text{-----(1)}$$

Where, Q.Y<sub>S</sub> – Quantum yield of the sample

Q.Y<sub>R</sub> – Quantum yield of the reference (Phenol)

Grad<sub>S</sub> – Slope of the Integrate intensity vs. absorbance line for sample

Grad<sub>R</sub> – Slope of the Integrate intensity vs. absorbance line for reference (Phenol)

η<sub>S</sub> – Refractive index of the sample

η<sub>R</sub> – Refractive index of the reference (Phenol)

Table S1. Comparison of the present work of nitrobenzene degradation with the published literature

| Catalyst                                            | catalyst dose | Initial NB conc | Light source          | Time   | parameters                | % deg. | Ref. |
|-----------------------------------------------------|---------------|-----------------|-----------------------|--------|---------------------------|--------|------|
| N-Ce-TiO <sub>2</sub>                               | 1 g/L         | 50 mg/L         | visible lamp, 300 W   | 4 hrs  | 30°C                      | 53     | 1    |
| TiO <sub>2</sub>                                    | 0.2 g/L       | 50.1 mg/L       | 14 W UV lamp, 254 nm  | 3 hrs  | air feeding of 150 mL/min | 90     | 2    |
| Nano crystalline TiO <sub>2</sub>                   | 0.2 g/L       | 49.94 mg/L      | mercury vapour lamp   | 8 hrs  | air purging               | 98%    | 3    |
| Ce-TiO <sub>2</sub>                                 | 0.1 g/L       | 25 mg/L         | Visible lamp 500 W    | 7 hrs  | pH 9                      | 100    | 4    |
| Pt/Cd <sub>2</sub> Sb <sub>2</sub> O <sub>6,8</sub> | 2.5 g/L       | 100.047 mg/L    | Xenon lamp            | 3 hrs  | CH <sub>3</sub> OH        | ~100   | 5    |
| TSA-MIP-TiO <sub>2</sub>                            | 0.1 g/L       | 6.153 mg/L      | 9 W UV lamp, 253.7 nm | 90 min | -                         | >95    | 6    |

Degradation of metronidazole (MTZ) antibiotic has been studied by different technologies such as ultraviolet (UV) irradiation, <sup>7</sup> Oxidation processes using UV, UV/H<sub>2</sub>O<sub>2</sub>, H<sub>2</sub>O<sub>2</sub>/Fe<sup>2+</sup>, and UV/H<sub>2</sub>O<sub>2</sub>/Fe<sup>2+</sup>, <sup>8</sup> etc. In general these processes are expensive and complicated. <sup>9</sup> Use of Closed Bottle Test (CBT) for MTZ degradation is also not effective because of its low degradation efficiency (25.6%) even after 28 days of incubation time.<sup>10</sup> Apart from these conventional method, use of photocatalyst were also studied as listed in Table S2. It shows lower degradation rate in visible light irradiation, 100% degradation was only achieved in UV-light irradiation and in high catalyst dose. In this approach our synthesized photocatalyst degraded 94.77% MTZ in visible light irradiation, 30 mg/L initial MTZ concentration, 0.5 g/L catalyst dose, and irradiation time of 120min.

Table S2. Comparison of the present work of metronidazole degradation with the published literature

| Catalyst                               | catalyst dose | Initial NB conc | Light source                          | Time    | parameters                               | % deg. | Ref. |
|----------------------------------------|---------------|-----------------|---------------------------------------|---------|------------------------------------------|--------|------|
| ZnSnO <sub>3</sub> /RGO nanocomposites | 1 g/L         | 5 mg/L          | 500 W, visible lamp                   | 180 min |                                          | 72.5   | 11   |
| Zn <sub>2</sub> GeO <sub>4</sub>       | 1 g/L         | 10 mg/L         | UV light lamp ( $\lambda = 253.7$ nm) | 80 min  | -                                        | ~100   | 12   |
| nZVM                                   | 0.1 g/L       | 100 mg/L        | -                                     | -       | 251°C, pH dependent, O <sub>2</sub> flow | 84     | 13   |

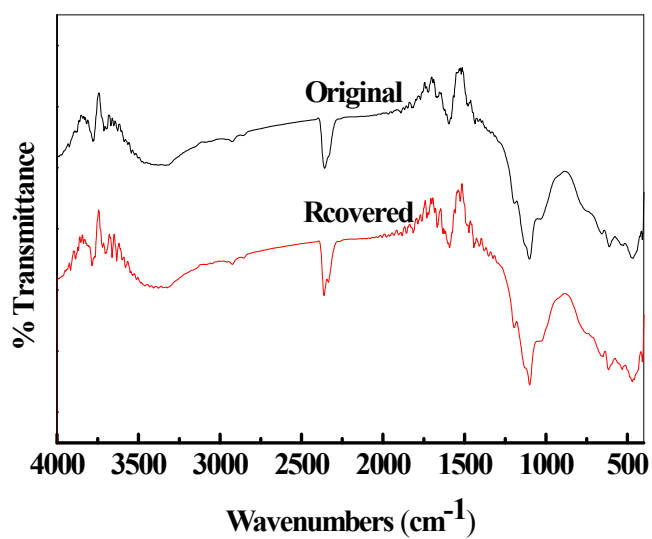

Figure S3. FT-IR spectra of Ag-h-TiO<sub>2</sub> before and after photocatalytic degradation of MTZ solution under visible light.

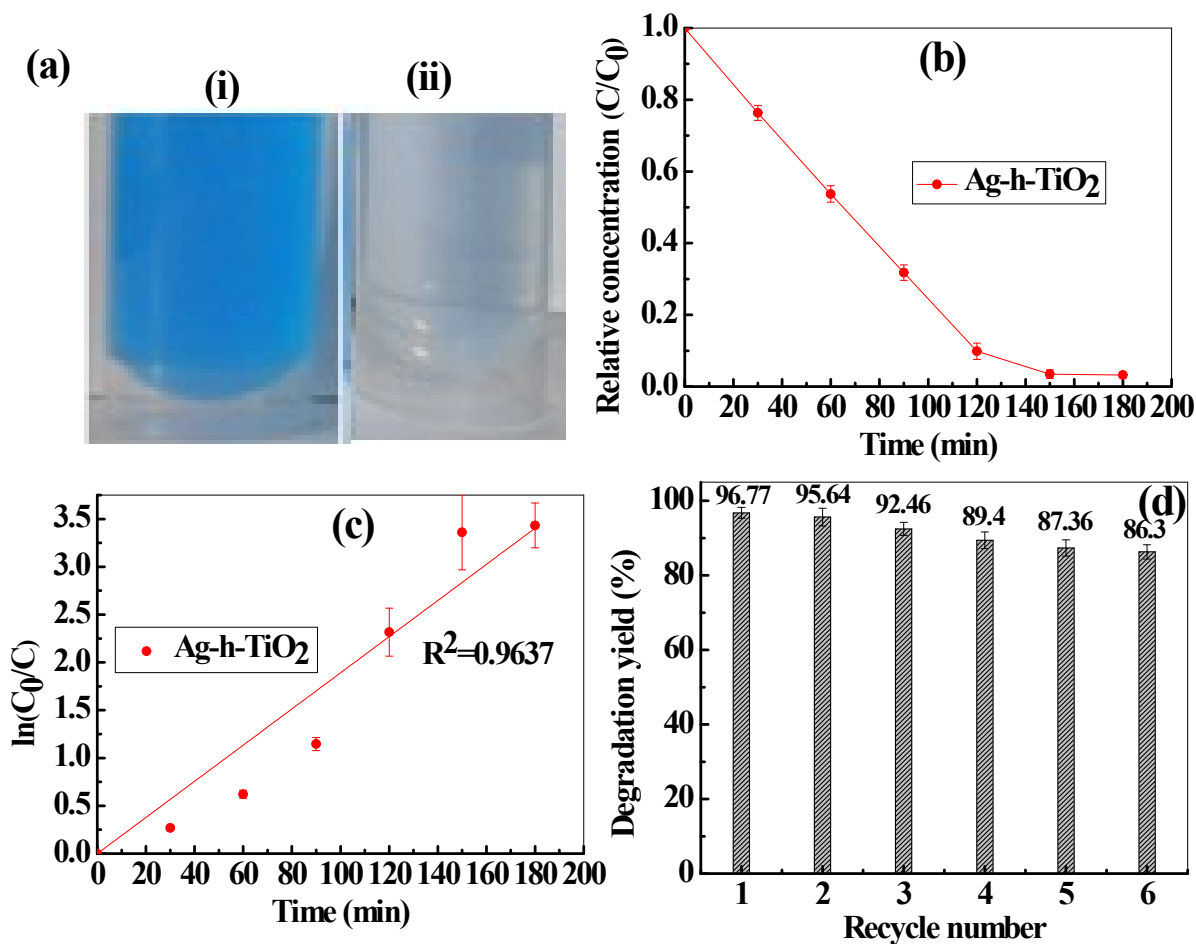

Figure S4. (a) The images of the methylene blue solution before (i) and after degradation under (ii: Ag-h-TiO<sub>2</sub>). (b) Photocatalytic degradation and (c) Kinetic data for the degradation of MBD solution in high pressure mercury vapour lamp under Ag-h-TiO<sub>2</sub> NPs. (d) Recycling test of Ag-h-TiO<sub>2</sub> for the degradation of MBD solution under visible light.

#### References

- Shen, X. -Z.; Liu, Z. -C.; Xie, S. -M.; Guo, J. Degradation of nitrobenzene using titania photocatalyst co-doped with nitrogen and cerium under visible light illumination. *J. Hazard. Mater.* **2009**, *162*, 1193–1198.
- Wang, T. -J.; Hsieh, M. -T.; Shi, T. -E.; Kuei, C. -H. UV-Irradiated Photo catalytic Degradation of Nitrobenzene by Titania Binding on Quartz Tube. *Int. J. Photoenergy.* **2012**, 1-8, doi:10.1155/2012/681941.
- Tayade, R. J.; Kulkarni, R. G.; Jasra, R. V. Photocatalytic Degradation of Aqueous Nitrobenzene by Nanocrystalline TiO<sub>2</sub>. *Ind. Eng. Chem. Res.* **2006**, *45*, 922-927.

4. Synthesis and Characterization of Cerium Doped Titanium Catalyst for the Degradation of Nitrobenzene Using Visible Light. *Int. J. Photoenergy*. **2014**, 1-9, doi:10.1155/2014/756408.
5. Baeissa, E. S. Pt/Cd<sub>2</sub>Sb<sub>2</sub>O<sub>6,8</sub> Nanoparticles for efficient Visible Light Photocatalysis. *Ceram. Int.* **2014**, *40*, 7195-7201.
6. Shen, X.; Zhu, L.; Wang, N.; Zhang, T.; Tang, H. Selective photocatalytic degradation of nitrobenzene facilitated by molecular imprinting with a transition state analog. *Catal. Today* **2014**, *225*, 164–170.
7. Prados-Joya, G.; Sánchez-Polo, M.; Rivera-Utrilla, J.; Ferro-garcía, M. Photodegradation of the Antibiotics Nitroimidazoles in Aqueous Solution by Ultraviolet Radiation. *Water Res.* 2011, *45*, 393–403.
8. Shemer, H.; Kunukcu, Y. K.; Linden, K. G. Degradation of the Pharmaceutical Metronidazole via UV, Fenton and Photo-Fenton processes. *Chemosphere* 2006, *63*, 269–276.
9. Johnson, M. B.; Mehrvar, M. Aqueous Metronidazole Degradation by UV/H<sub>2</sub>O<sub>2</sub> Process in Single-and Multi-Lamp Tubular Photoreactors: Kinetics and Reactor Design. *Ind. Eng. Chem. Res.* 2008, *47*, 6525–6537.
10. Alexy, R.; Kümpel, T.; Kümmerer, K. Assessment of Degradation of 18 Antibiotics in the Closed Bottle Test. *Chemosphere* 2004, *57*, 505–512.
11. Dong, S.; Sun, J.; Li, Y.; Yu, C.; Li, Y.; Sun, J. ZnSnO<sub>3</sub> Hollow Nanospheres/Reduced Graphene Oxide Nanocomposites as High-Performance Photocatalysts for Degradation of Metronidazole. *Applied Catalysis B: Environmental* 2014, *144*, 386–393.
12. Liu, J.; Zhang, G.; Jimmy C. Yu, J. C.; Guo, Y. In Situ Synthesis of Zn<sub>2</sub>GeO<sub>4</sub> Hollow Spheres and their Enhanced Photocatalytic Activity for the Degradation of Antibiotic Metronidazole. *Dalton Trans.* 2013, *42*, 5092–5099.
13. Fang, Z.; Qiu, X.; Chen, J.; Qiu, X. Degradation of Metronidazole by Nanoscale Zero-Valent Metal Prepared from Steel Pickling Waste Liquor. *Applied Catalysis B: Environmental* 2010, *100*, 221–228.
